# Supplementary material
Source: publisher site journal article supplement (https://www.dovepress.com/article/461866)
Supplement: Supplementary file 1 [file get_supplementary_file.php]

Supporting Information

1. **Instruments**

1H-NMR and solid-state 13C CP-MAS NMR spectra were obtained on Bruker Avance-400 HD and AVANCE II 400 spectrometers, respectively. HRMS analysis was recorded on a Bruker maXis ultra-high resolution mass spectrometer. FT-IR spectroscopy was conducted on a Bruker ALPHA spectrometer. SEM was employed using the Gemini Zeiss SUPRA scanning electron microscope. TEM was recorded on a Hitachi HT7700 120 kV Compact-Digital Transmission Electron Microscope. The PXRD patterns were measured on a D8 Advance X-ray powder diffractometer with Cu Κ*α* radiation (*λ* = 1.5405 Å). Nitrogen-adsorption isotherms were performed on an ASAP 2020/TriStar 3000 (Micromeritics) at 77 K. TGA was performed on a TGA/DSC1-Thermogravimetric Analyzer (Mettler Toledo) from 25 to 800°C under flowing nitrogen atmosphere. The concentration of T705 was obtained with UV-Vis spectroscopy (TU-1900 Beijing PuXi). The particle size was measured on a Malvern Zetasizer Nano ZS90 apparatus. Fluorescence spectrums were recorded on the Edinburgh Fluorescence Spectrometer (FLS-980) with a Xenon lamp. Fluorescence images were captured on a Leica TCS SP8 Confocal Laser Scanning Microscopy. Microplate assays were carried out on a Molecular Devices SpectraMax i3x Multi-Mode Microplate Detection System. The morphology of the cells was taken with a Leica DMI3000 B Inverted Fluorescence Microscope.

1. **Synthesis and characterization of 1,3,5-triformylphloroglucinol (Tp)**

Based on previous reports,1 a mixture of hexamethylene tetraamine (7.42 g, 52.9 mmol), dried phloroglucinol (3.0 g, 23.8 mmol) in 45 mL of trifluoroacetic acid was heated at 100°C for 2.5 h in N2 atmosphere. After addition of 75 mL of 3 M HCl, the mixture was heated at 100°C for additional 1 h. After cooling to room temperature, the solution was filtered through Celite, extracted with dichloromethane, and dried over anhydrous magnesium sulfate. Rotary evaporation of the solution afforded 1,3,5-triformylphloroglucinol as an off-white powder (0.54 g, 18% yield). 1H NMR (400 MHz, CDCl3, *δ*, ppm) 14.14 (s, 3H), 10.17 (s, 3H). ESI-MS: calcd for [C9H6O6-H] *m/z* 209.01, found *m/z* 209.01; FT-IR (KBr, cm-1): 2887(w), 1643(s), 1606(m), 1434(s), 1251(m), 1192(s), 968(s), 873(m), 788(m), 608(s).

**Scheme S1**. Synthesis of Tp.


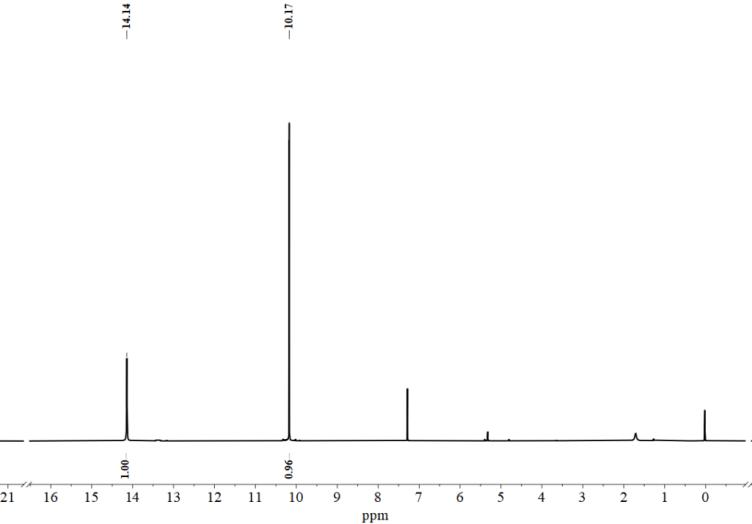


**Figure S1** 1H-NMR (in CDCl3) spectra of Tp.


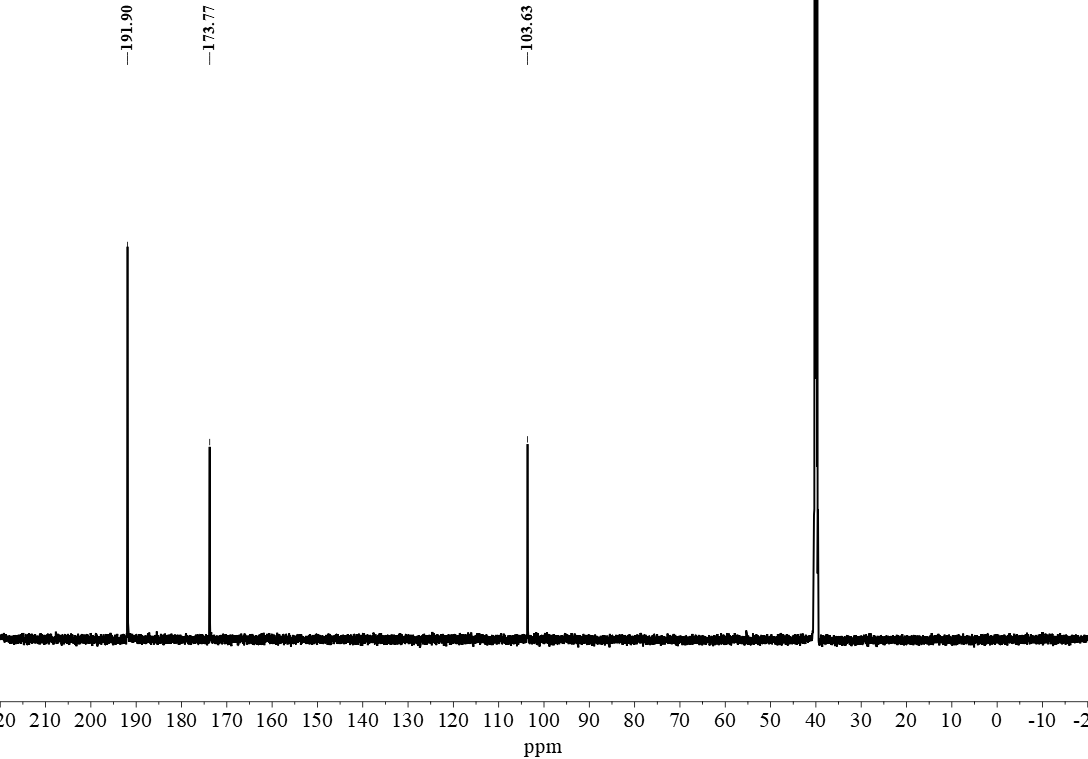


**Figure S2** 13C-NMR (in DMSO-*d*6) spectra of Tp.

**Table S1** Information for ssDNA sequences employed in this work

| Name | Specificity | Sequence (5′-3′) |
| --- | --- | --- |
| Cy3-labeled ssDNA (T0) |  | Cy3-TAA GAC CTG CTG TAG CAT CTT CGC CGT TGT aaa aa-NH2 |
| ssDNA-Probe |  | Cy3-TAA GAC CTG CTG TAG CAT CTT CGC CGT TGT |
| Target ssDNA (T) | Complementary ss-DNA for T0 and ssDNA-Probe | aca acg gcg aag atg cta cag cag gtc tta |
| Mismatched ssDNA-1 (T1) | Partial base pair mutated for T0 and ssDNA-Probe | aca aca ata ggg aga cta agt tca gtc tta |
| Mismatched ssDNA-2 (T2) | Non-specific ss-DNA for T0 and ssDNA-Probe | acg cat act cgt aGT TCc act cat tcg tta |
| Mismatched ssDNA-3 (T3) | gag cca tca gct ata tgc cga gtg act cta |

1. **Characterization of DATA-COF**


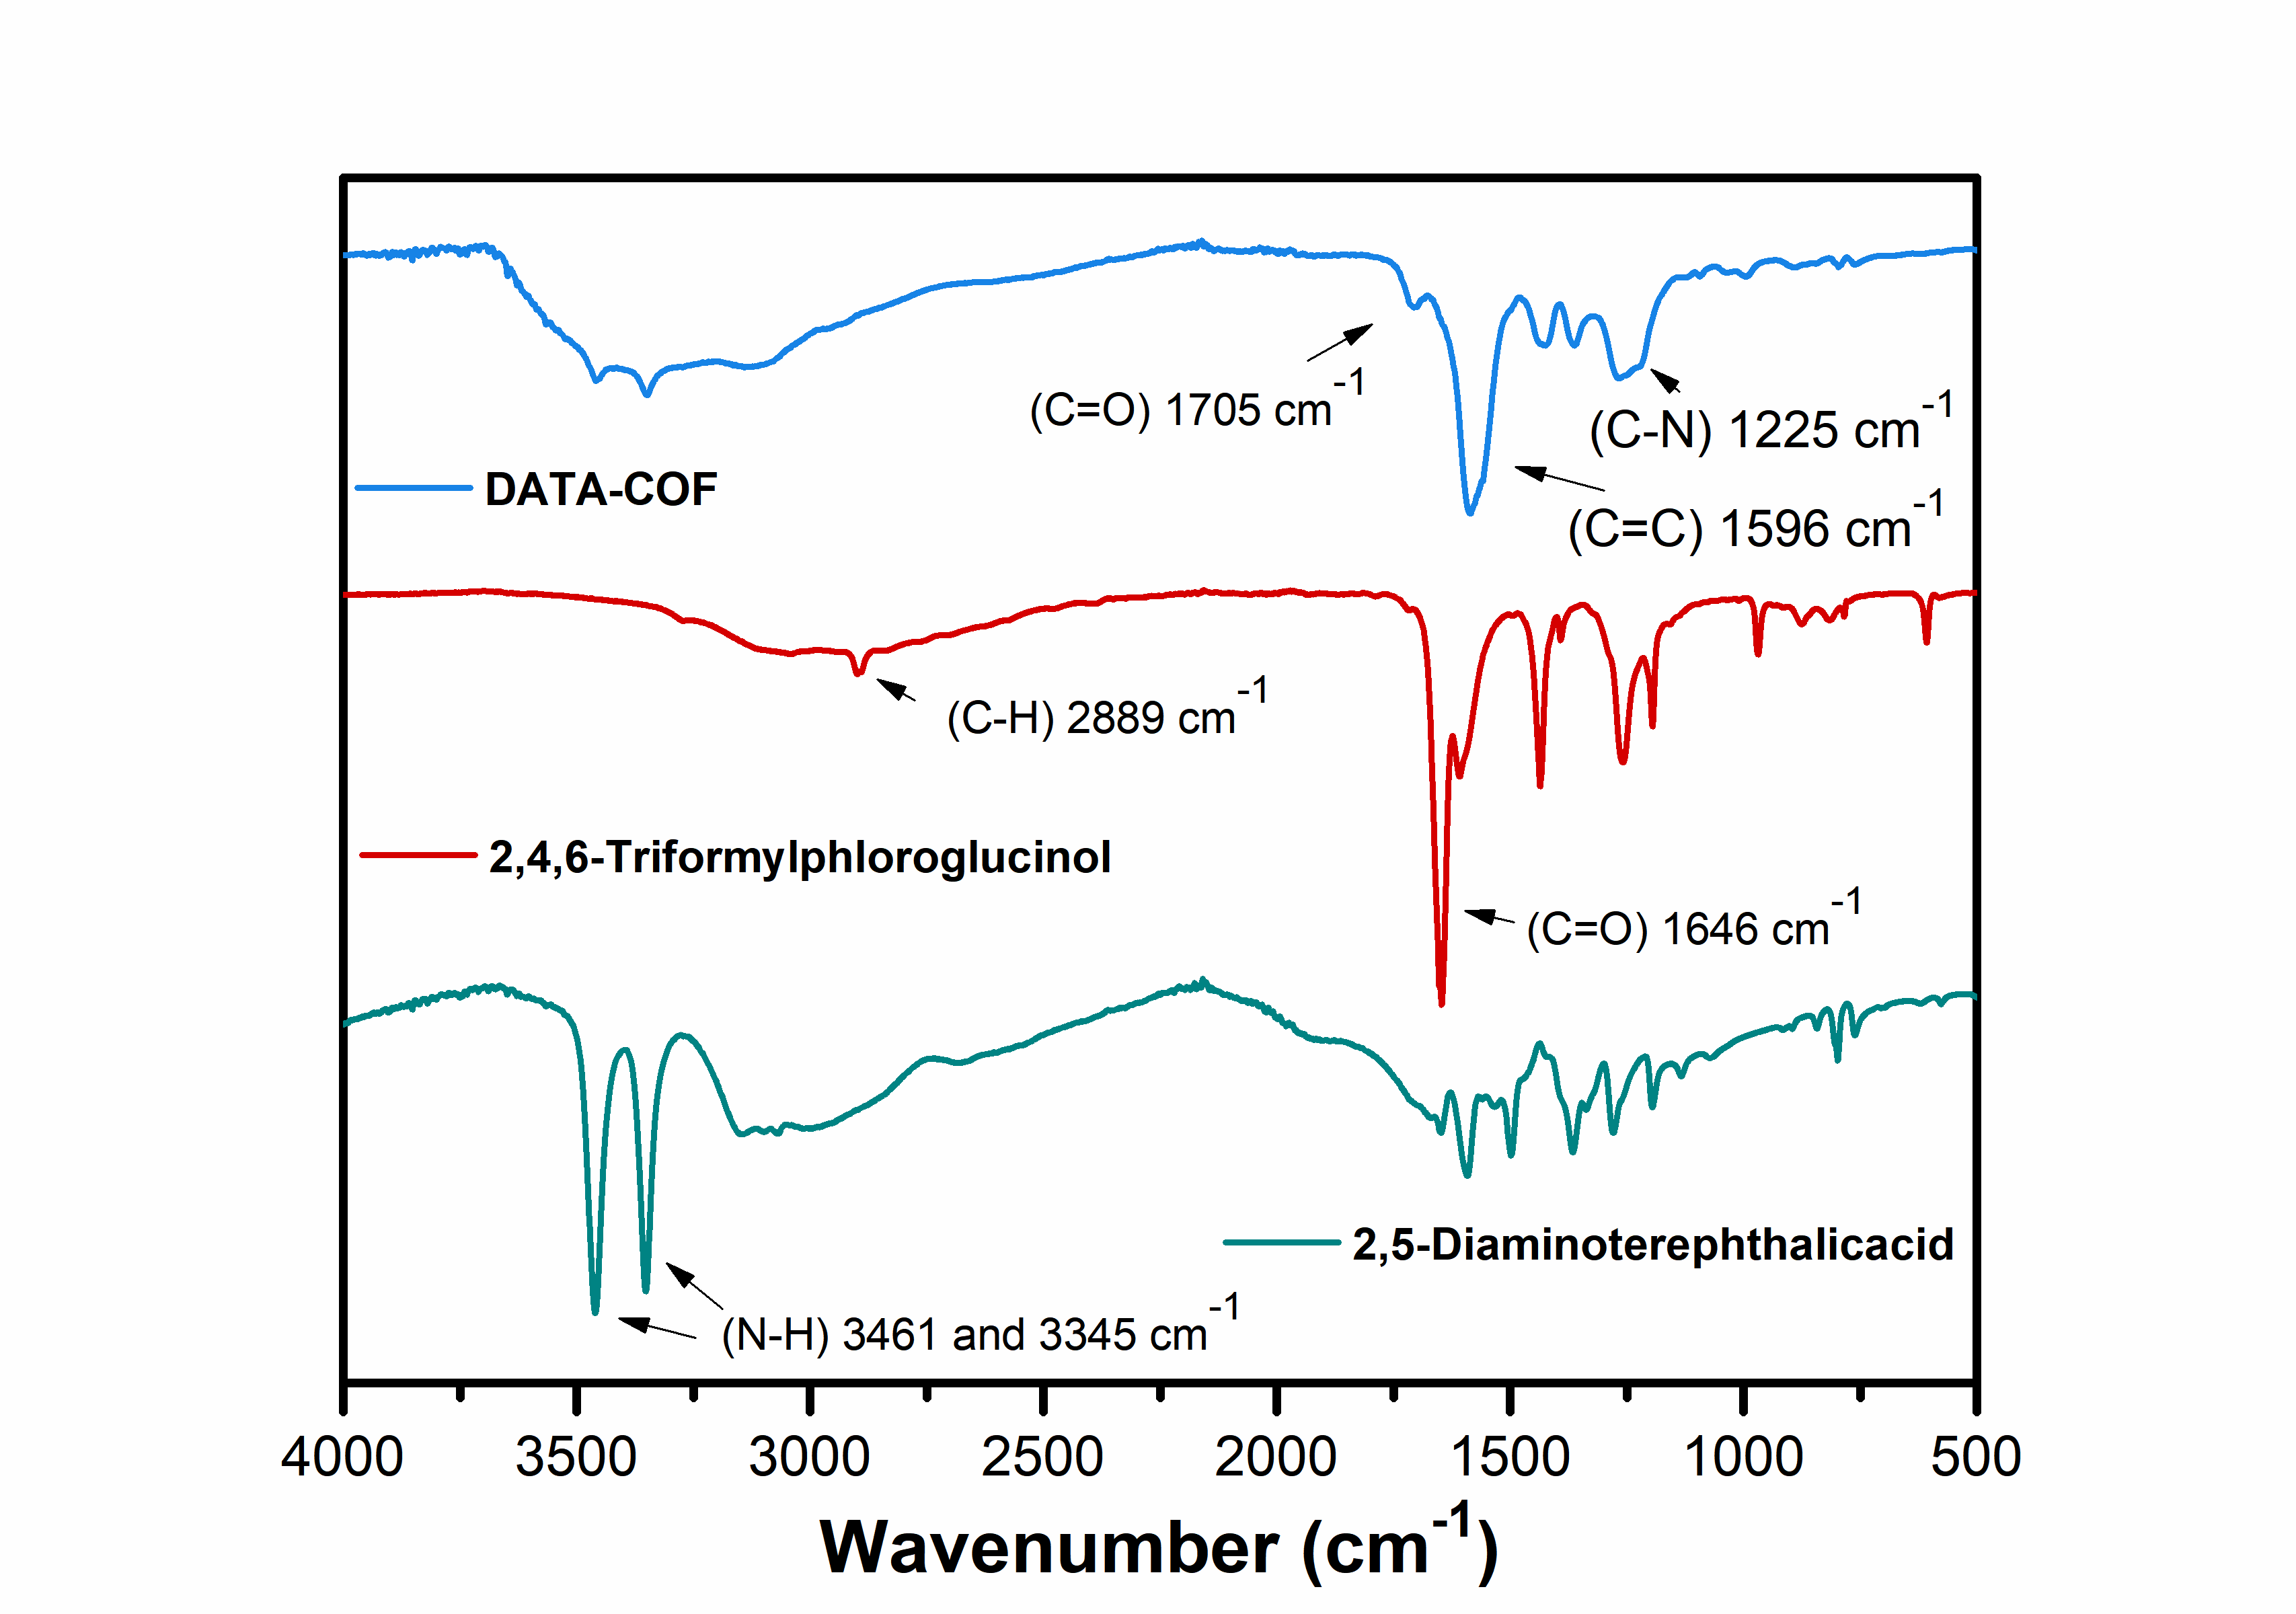


**Figure S3** FT-IR spectra of DATA-COF and the starting monomers.


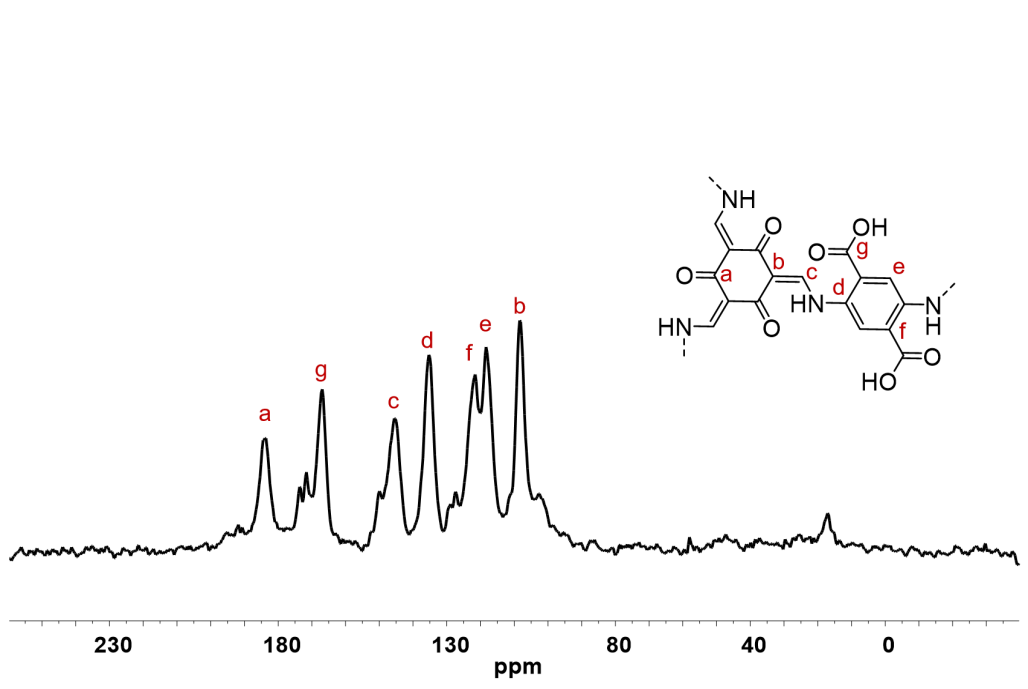


**Figure S4** Solid-state 13C CP-MAS NMR spectrum of DATA-COF.

**Figure S5** Top and side view of DATA-COF simulated structure of the AA stacking mode.

**Table S2** Fractional atomic coordinates for the unit cell of DATA-COF.

| AA stacking mode, Space group: *P*6 | | | |
| --- | --- | --- | --- |
| *a* = *b* = 22.83 Å, *c* = 3.81 Å, *α* = *β* = 90.0°, *γ* = 120.0°, *R*wp=10.14% and *R*p = 7.75% | | | |
| Atom | x | y | z |
| C1 | 0.42858 | 0.96182 | 0.49431 |
| C2 | 0.46651 | 0.92822 | 0.53203 |
| C3 | 0.53725 | 0.96731 | 0.51412 |
| N4 | 0.43851 | 0.85699 | 0.60999 |
| C5 | 0.37009 | 0.80321 | 0.56323 |
| C6 | 0.35403 | 0.73941 | 0.47874 |
| C7 | 0.35583 | 0.92764 | 0.40266 |
| O8 | 0.31185 | 0.94586 | 0.55786 |
| O9 | 0.33428 | 0.88569 | 0.16958 |
| C10 | 0.28201 | 0.68721 | 0.43235 |
| O11 | 0.24148 | 0.70413 | 0.3395 |
| H12 | 0.56588 | 0.94119 | 0.50486 |
| H13 | 0.47179 | 0.84381 | 0.72553 |
| H14 | 0.32927 | 0.81237 | 0.62272 |
| H15 | 0.33329 | 0.98021 | 0.75293 |

**Figure S6** SEM images of DATA-COF.

1. **Characterization of T705@DATA-COF-Pro**


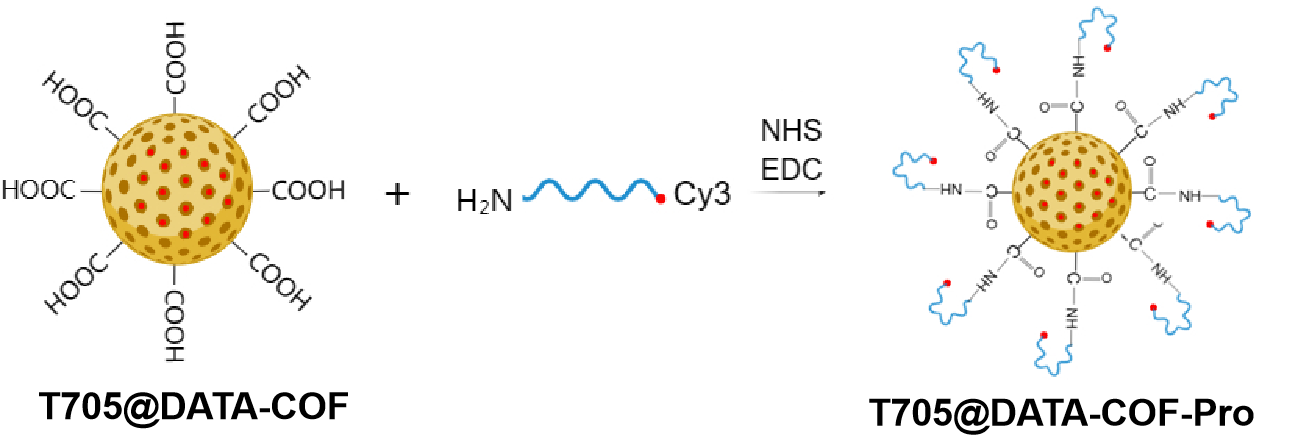


**Scheme S2** Schematic illustration of the synthesis of T705@DATA-COF-Pro.


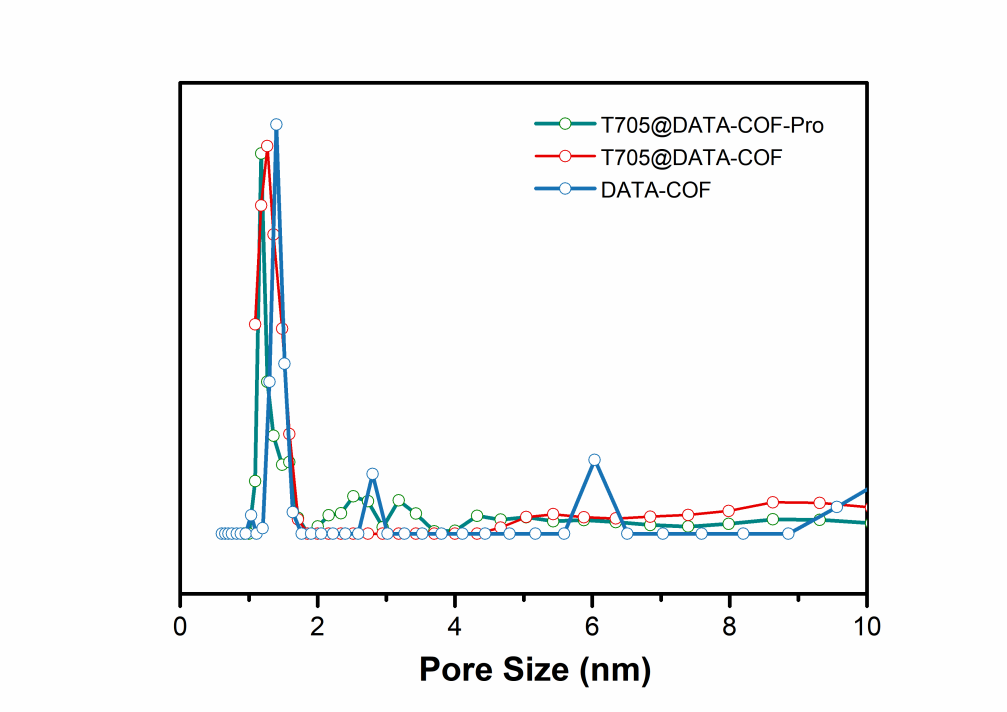


**Figure S7** The pore size distribution of DATA-COF, T705@DATA-COF and T705@DATA-COF-Pro.


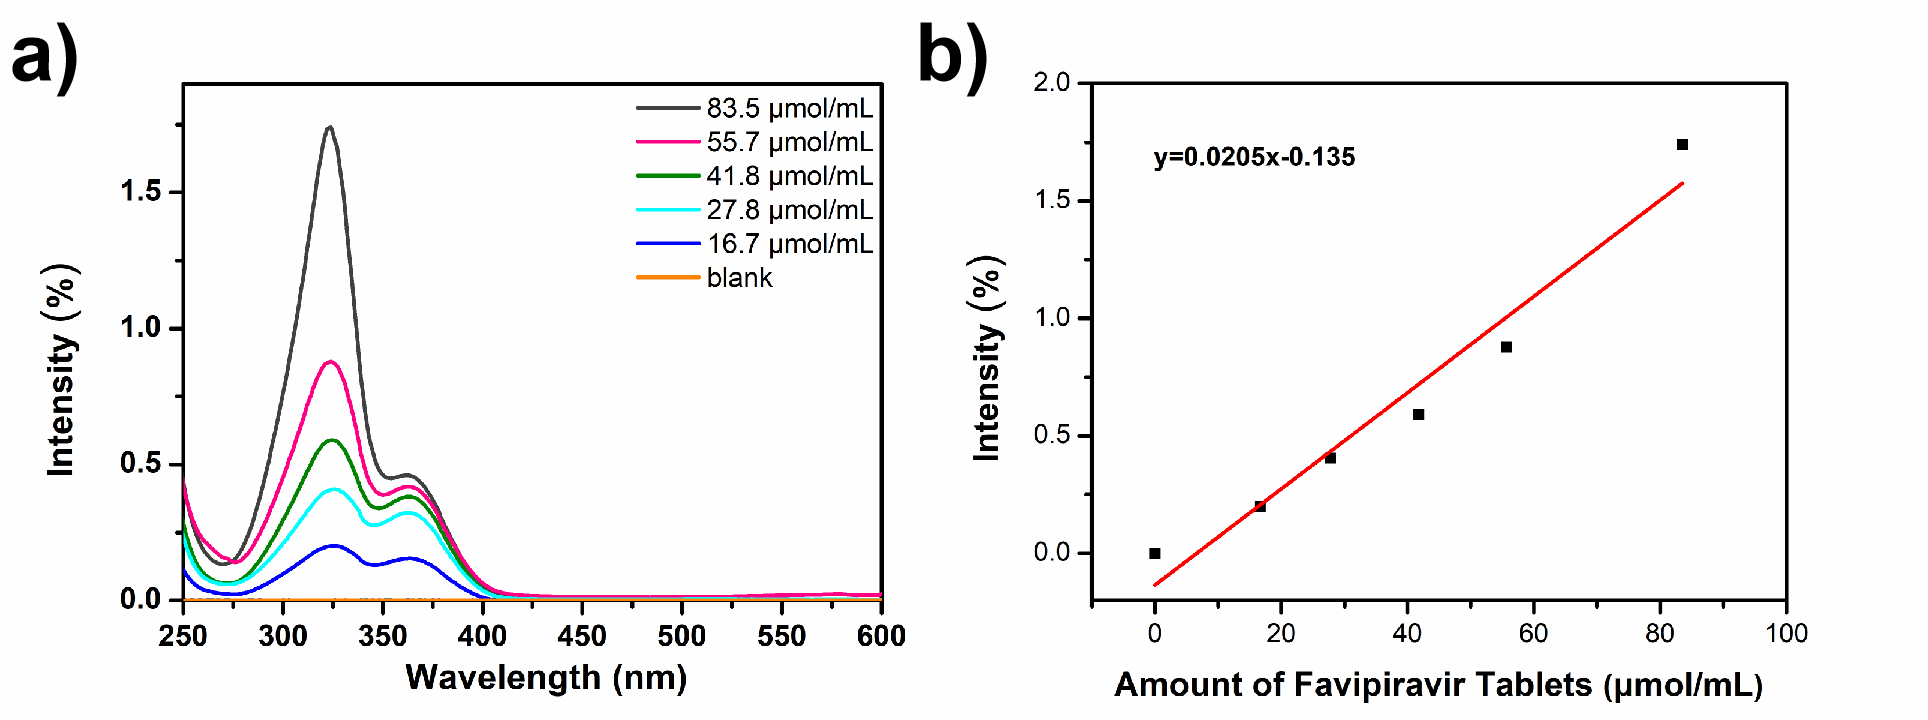


**Figure S8** a) UV-Vis spectroscopy and b) standard curve of T705 in methanol.


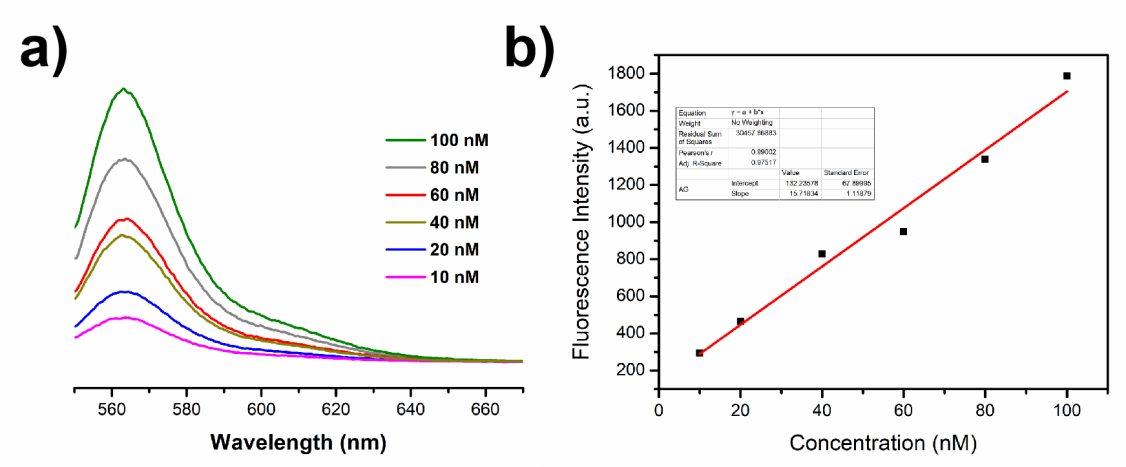


**Figure S9** a) Fluorescence spectroscopy and b) fluorescence standard curve.


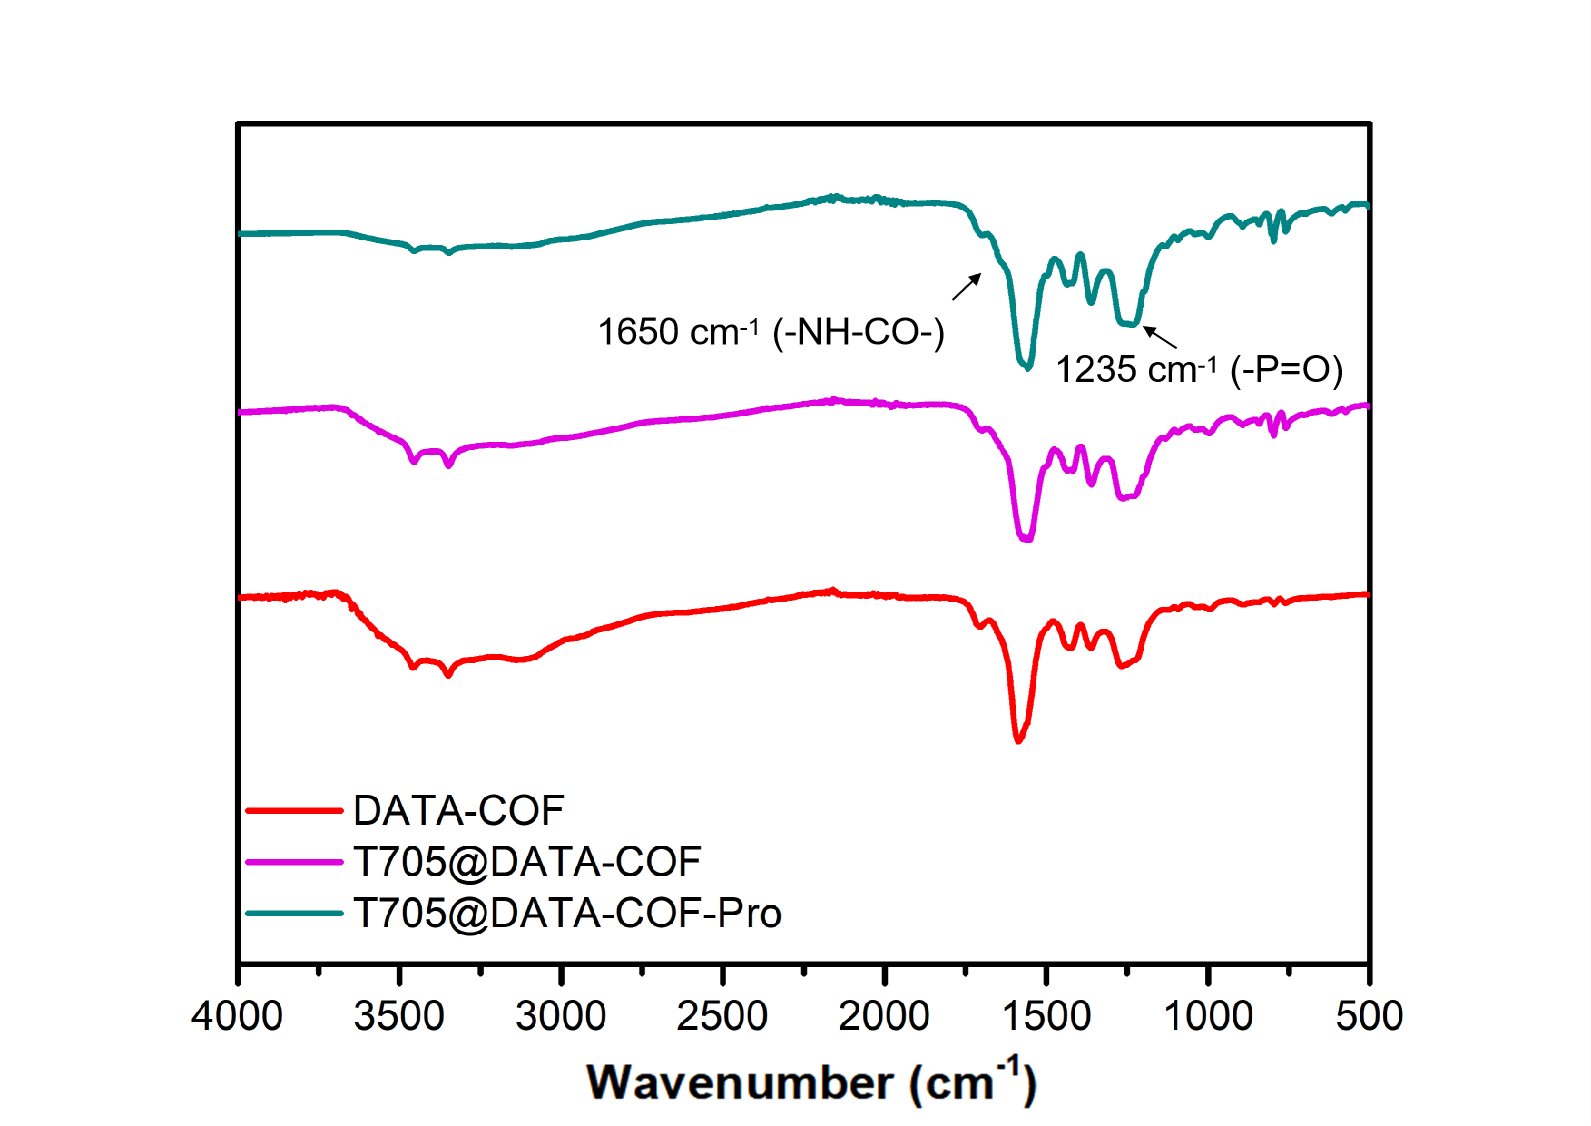


**Figure S10** FT-IR pattern of DATA-COF, T705@DATA-COF and T705@DATA-COF-Pro.


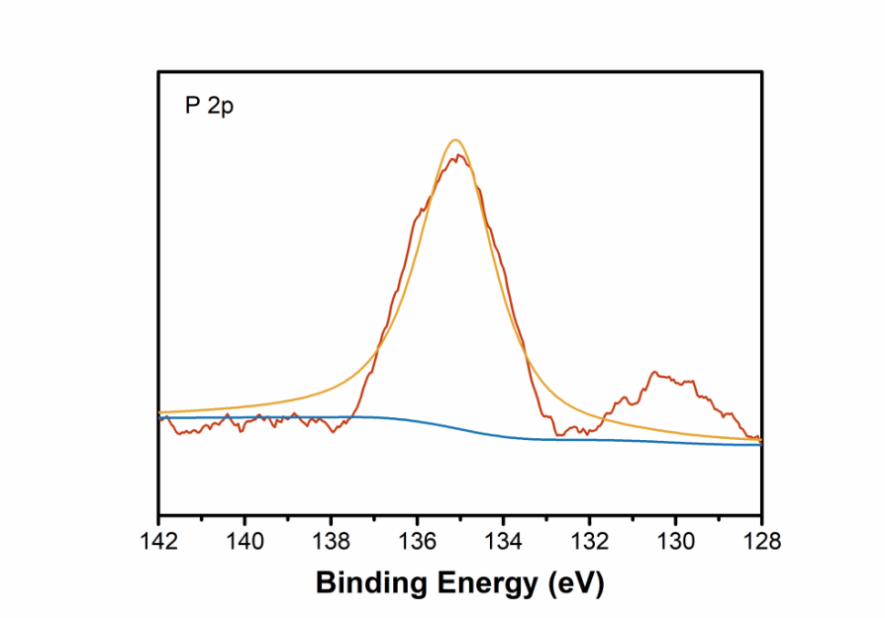


**Figure S11** XPS spectrum of P2p in T705@DATA-COF-Pro.


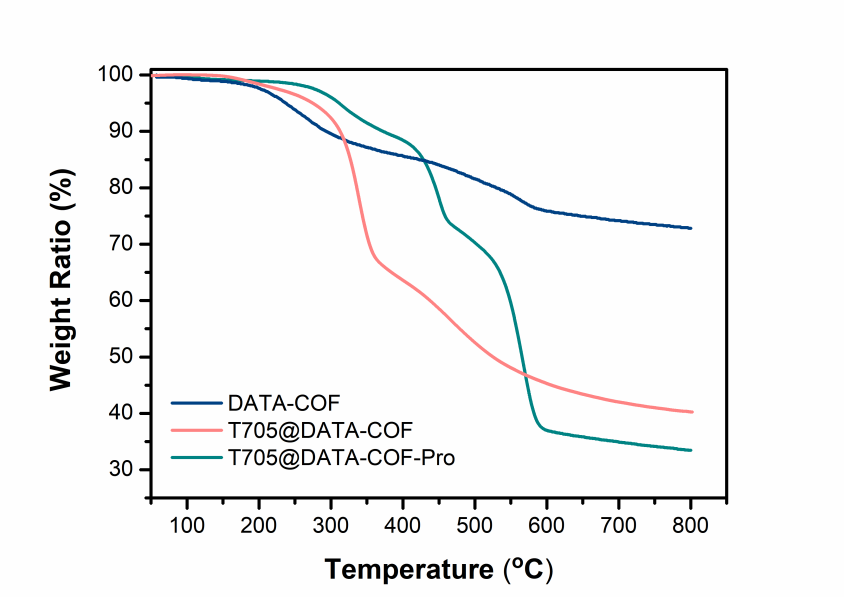


**Figure S12** The TGA curves of DATA-COF, T705@DATA-COF and T705@DATA-COF-Pro.


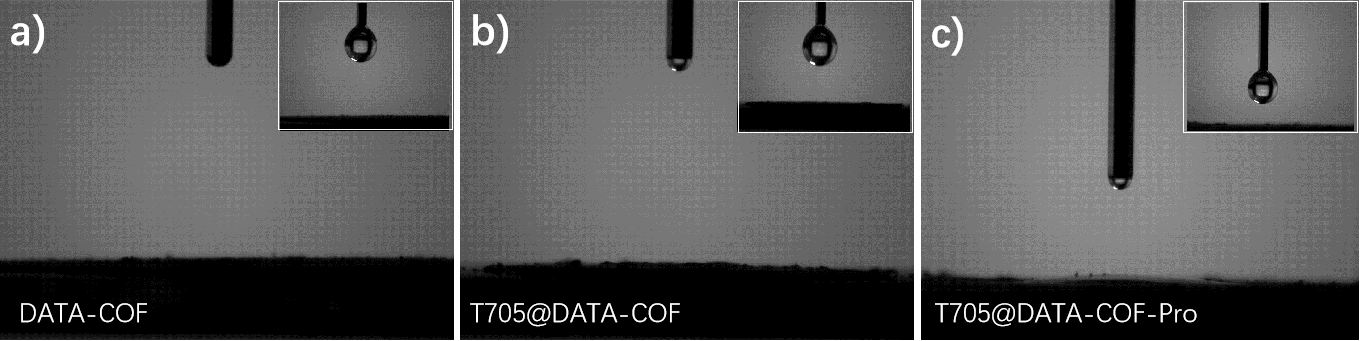


**Figure S13** The water contact angles of a) DATA-COF, b) T705@DATA-COF and c) T705@DATA-COF-Pro, respectively. Inset：photographs of water droplets before falling.


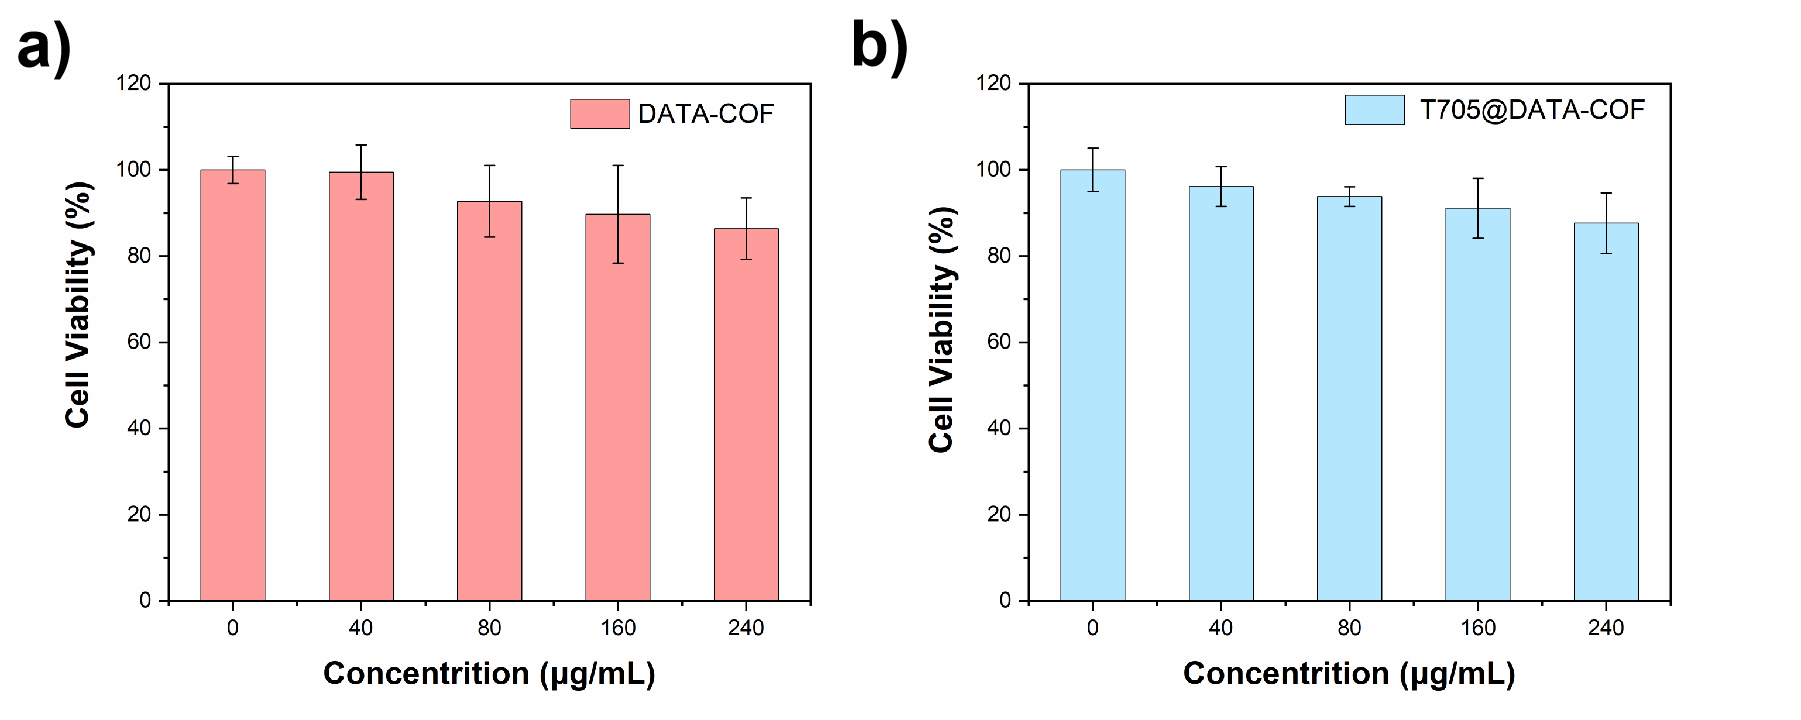


**Figure S14** Cytotoxicity of a) DATA-COF and b) T705@DATA-COF.


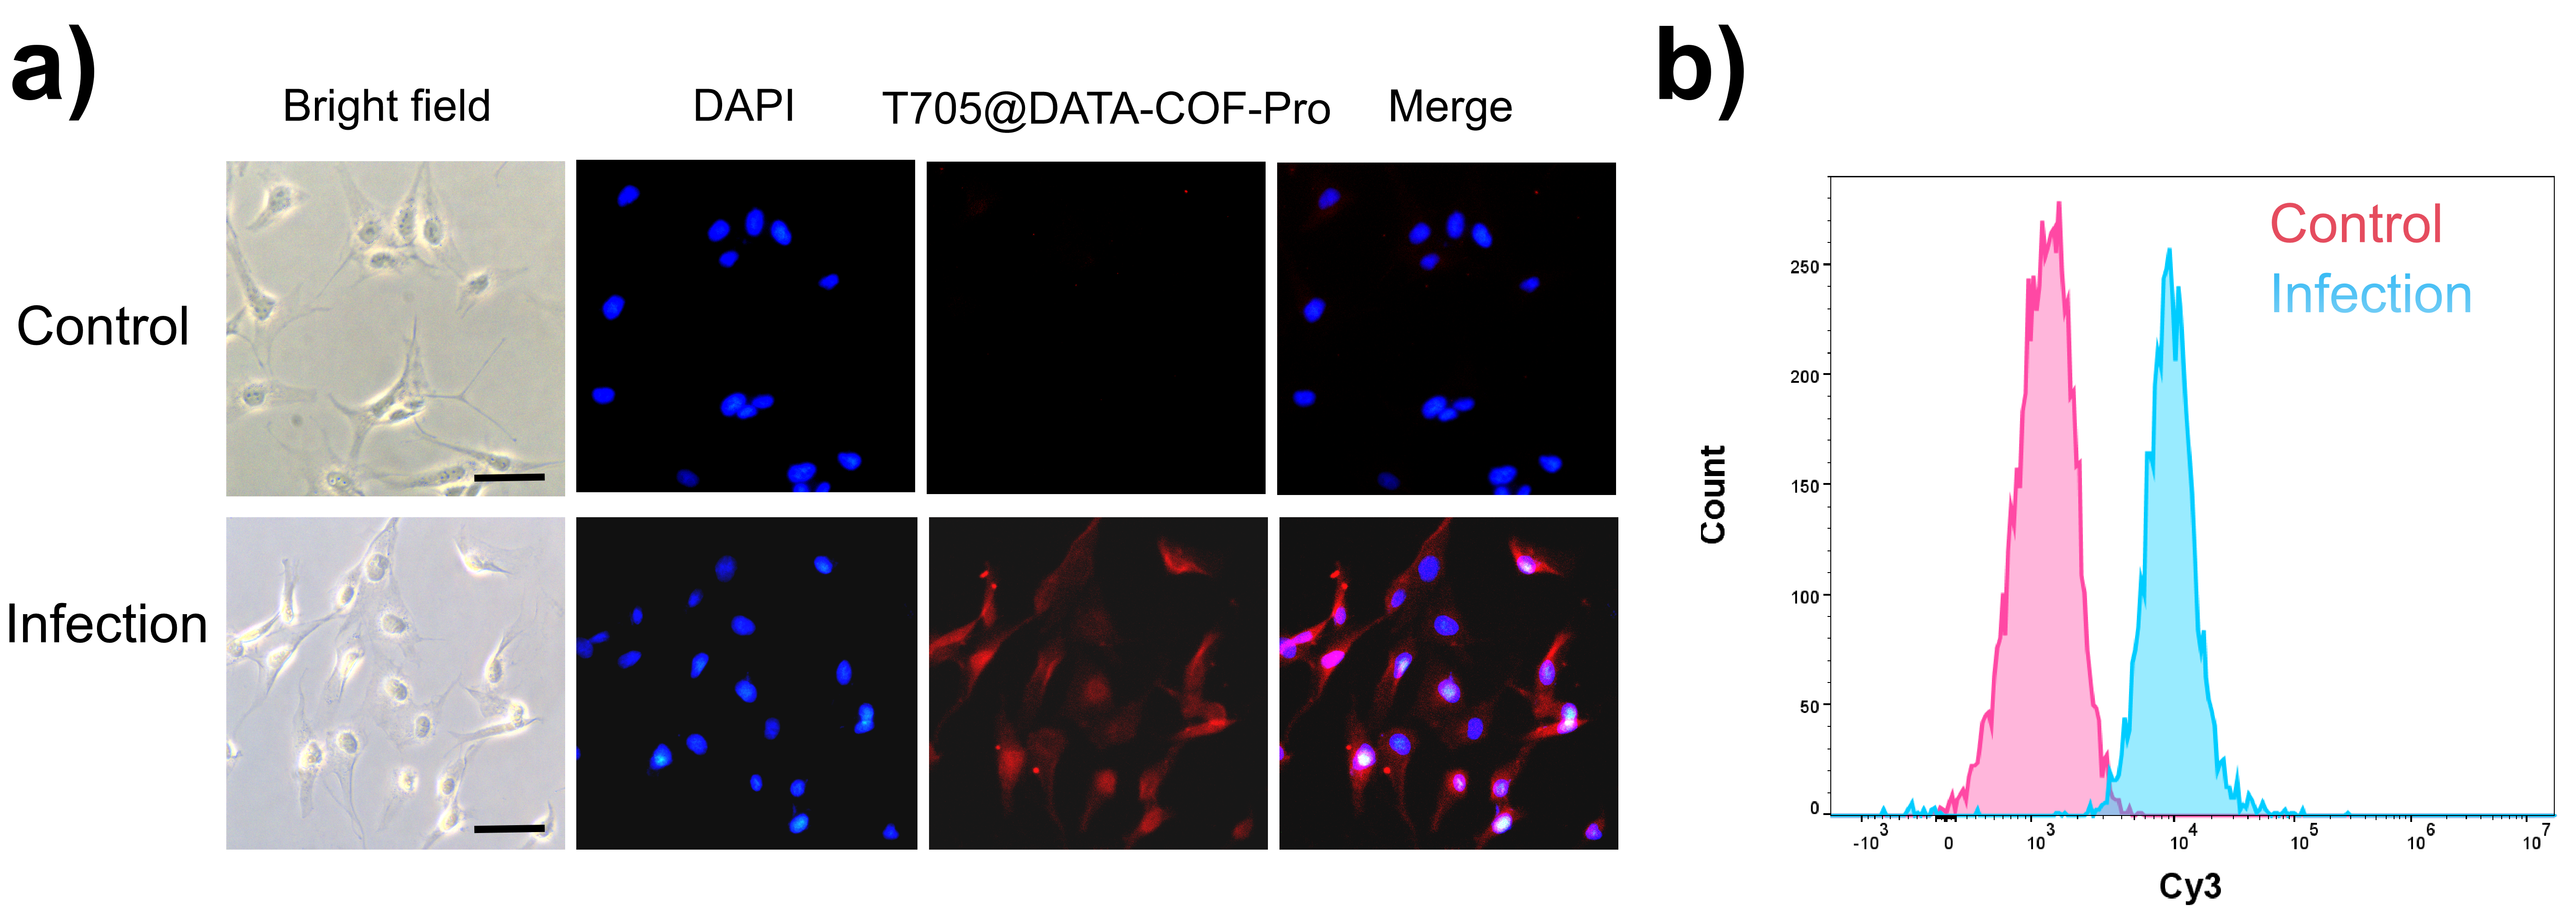


**Figure S15** Infection diagnosis application of the T705@DATA-COF-Pro. a) Fluorescence imaging and b) Flow cytometry quantitative analysis of MDCK cells treated with T705@DATA-COF-Pro. Control group: Uninfected H1N1 group, Infection group: Infected H1N1 group. Scale bar: 100 μm.

1. **Therapeutic performance**


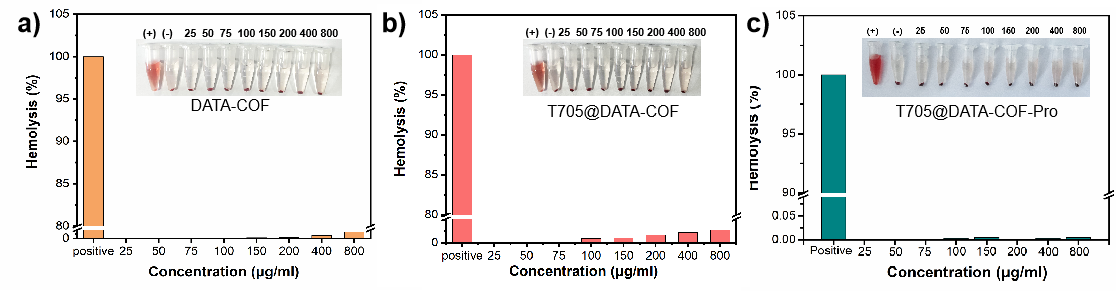


**Figure S16** Hemolytic assay using red blood cells incubated with control solvents and different concentrations of a) DATA-COF, b) T705@DATA-COF, and c) T705@DATA-COF-Pro. Inset: Hemolysis in red blood cells created by different treatment. Water and PBS were used as the positive and negative control, respectively.


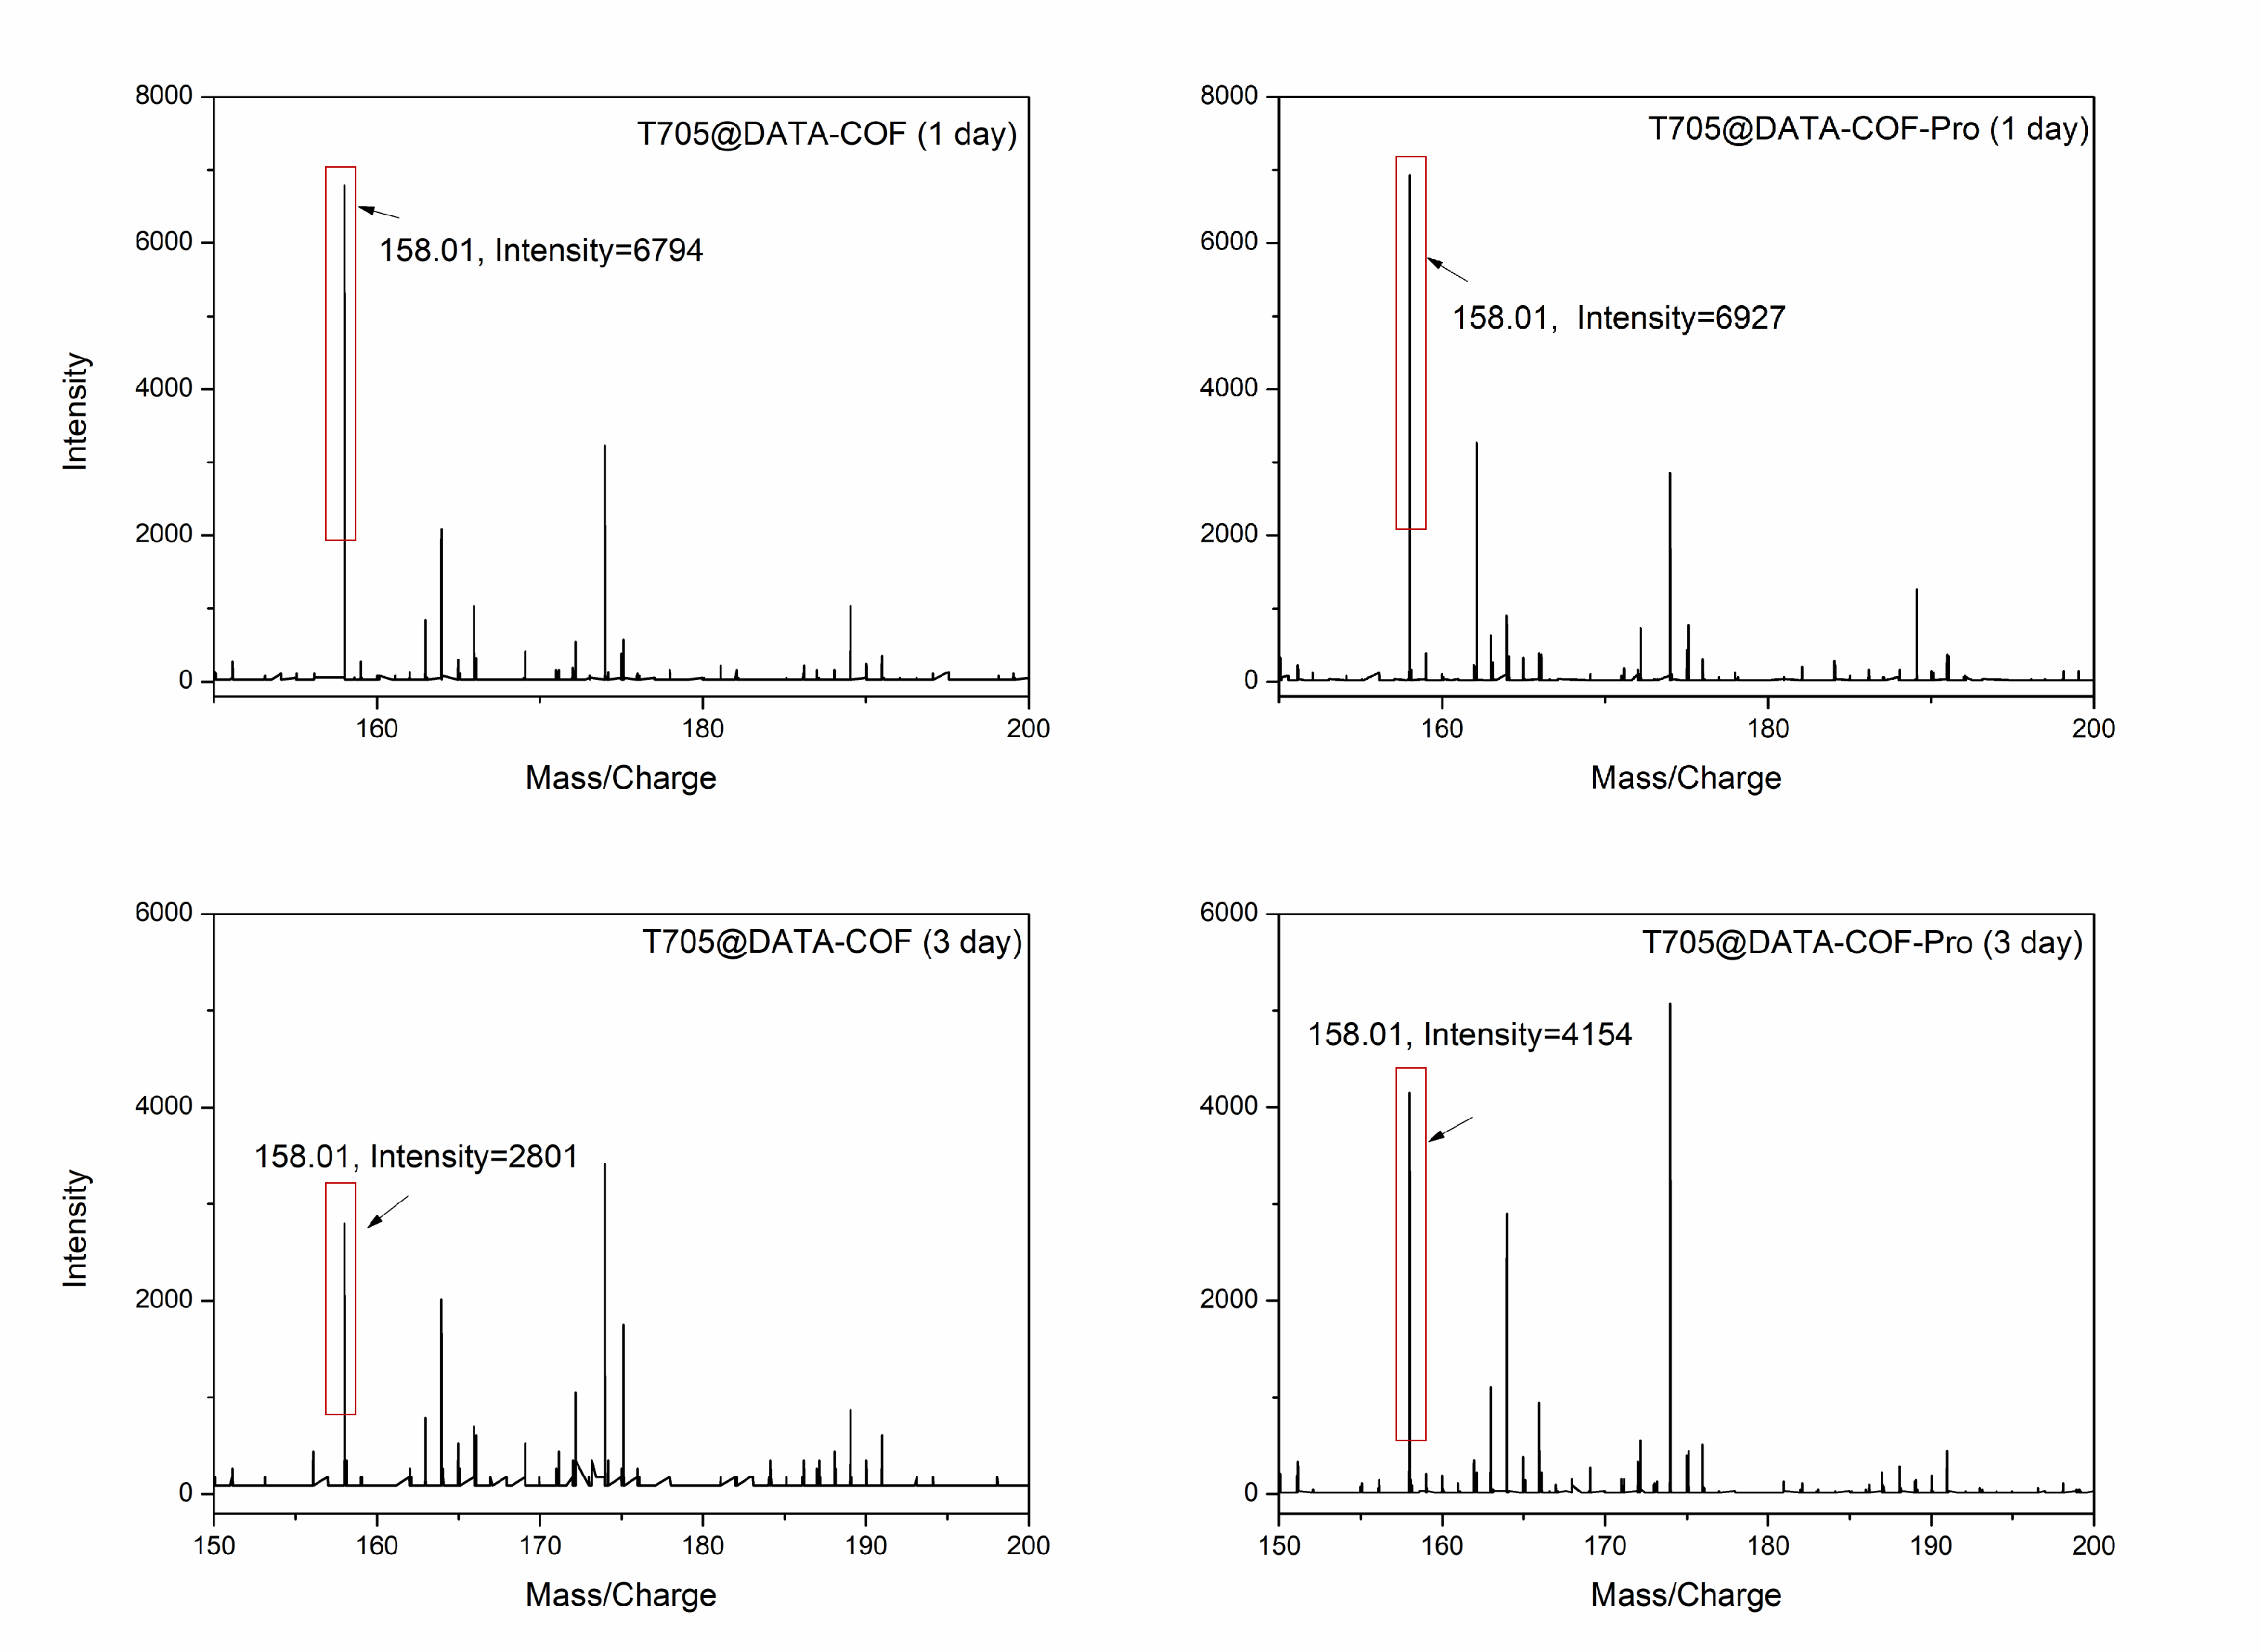


**Figure S17** The amount of T705 in infected mice's blood using HRMS on 1st and 3rd day (158.01 is the molecular ion peak of T705).


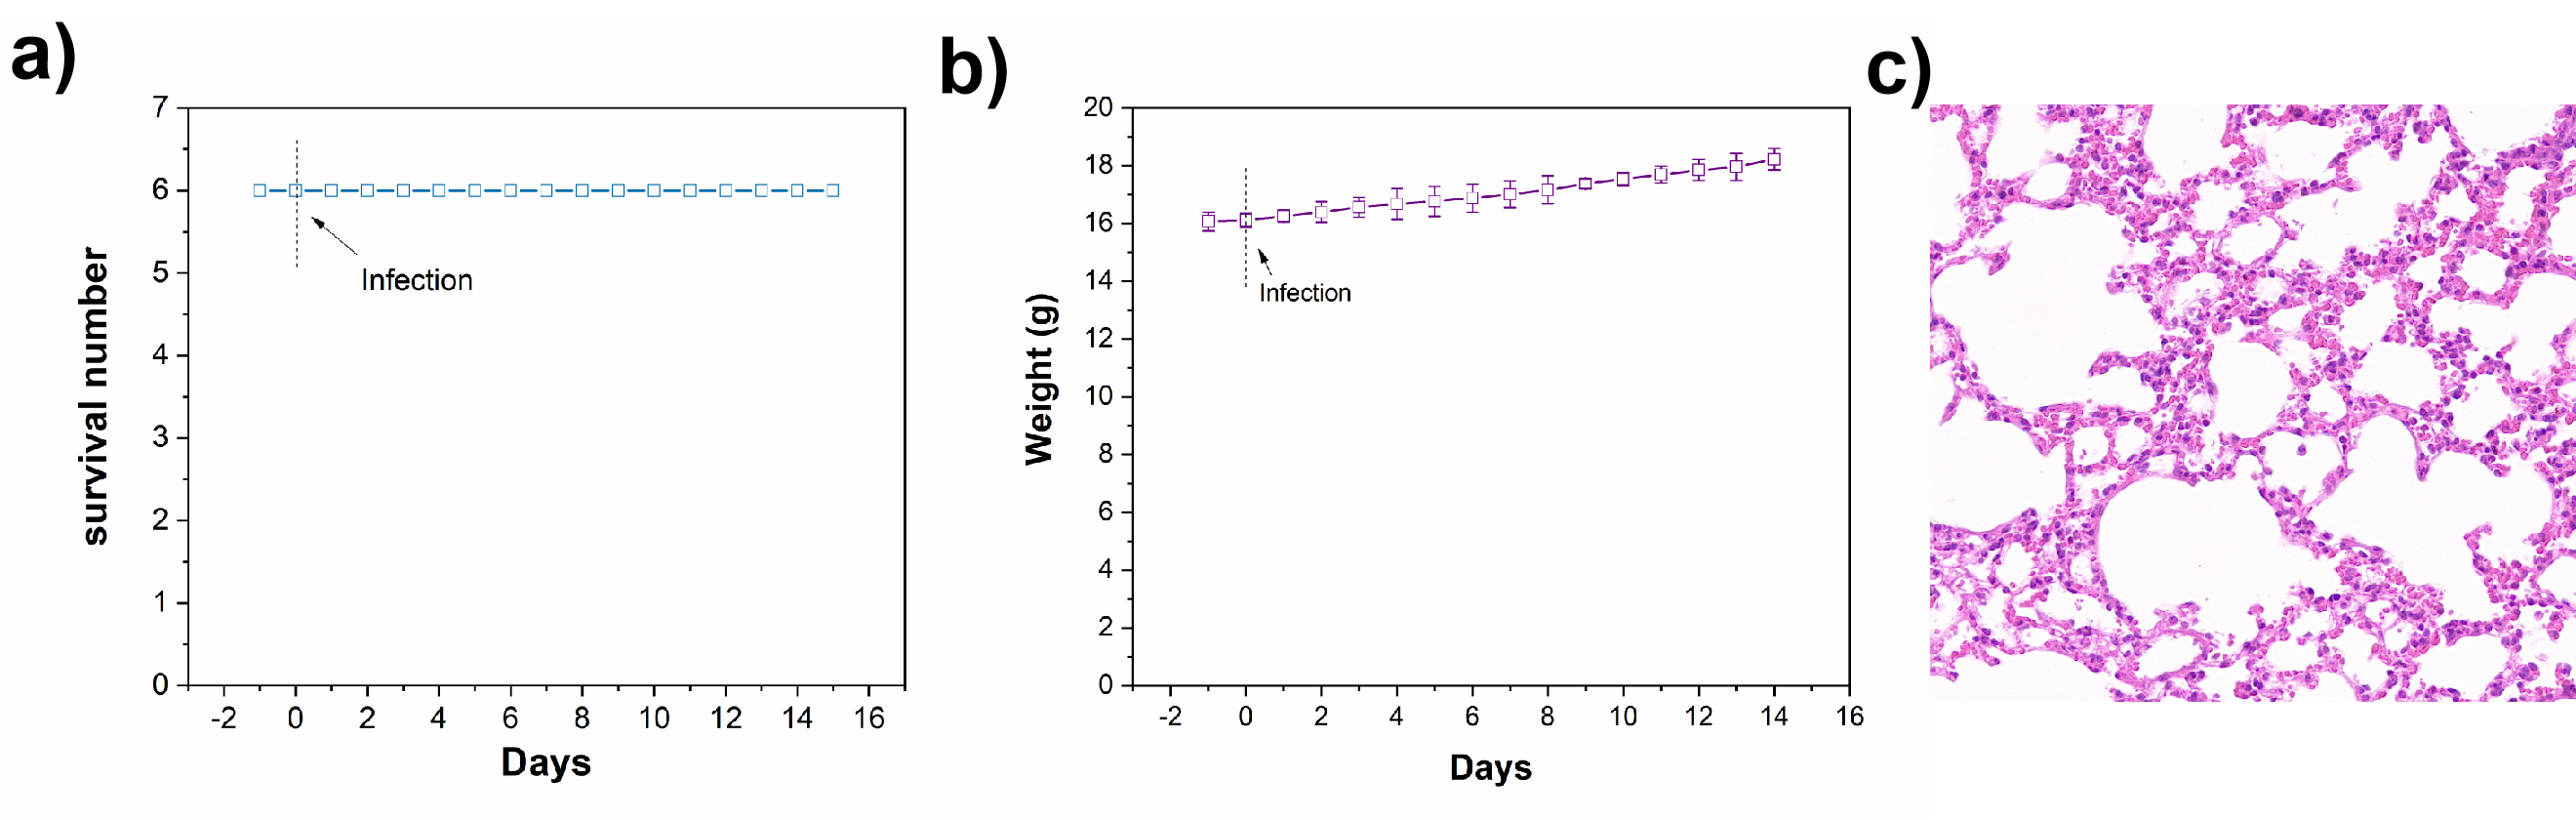


**Figure S18** Mice were treated with T705@DATA-COF-Pro (2.0 mg/mL). a) Survival rates. b) Body weights of mice. c) H&E staining of mouse lungs on 7th day .


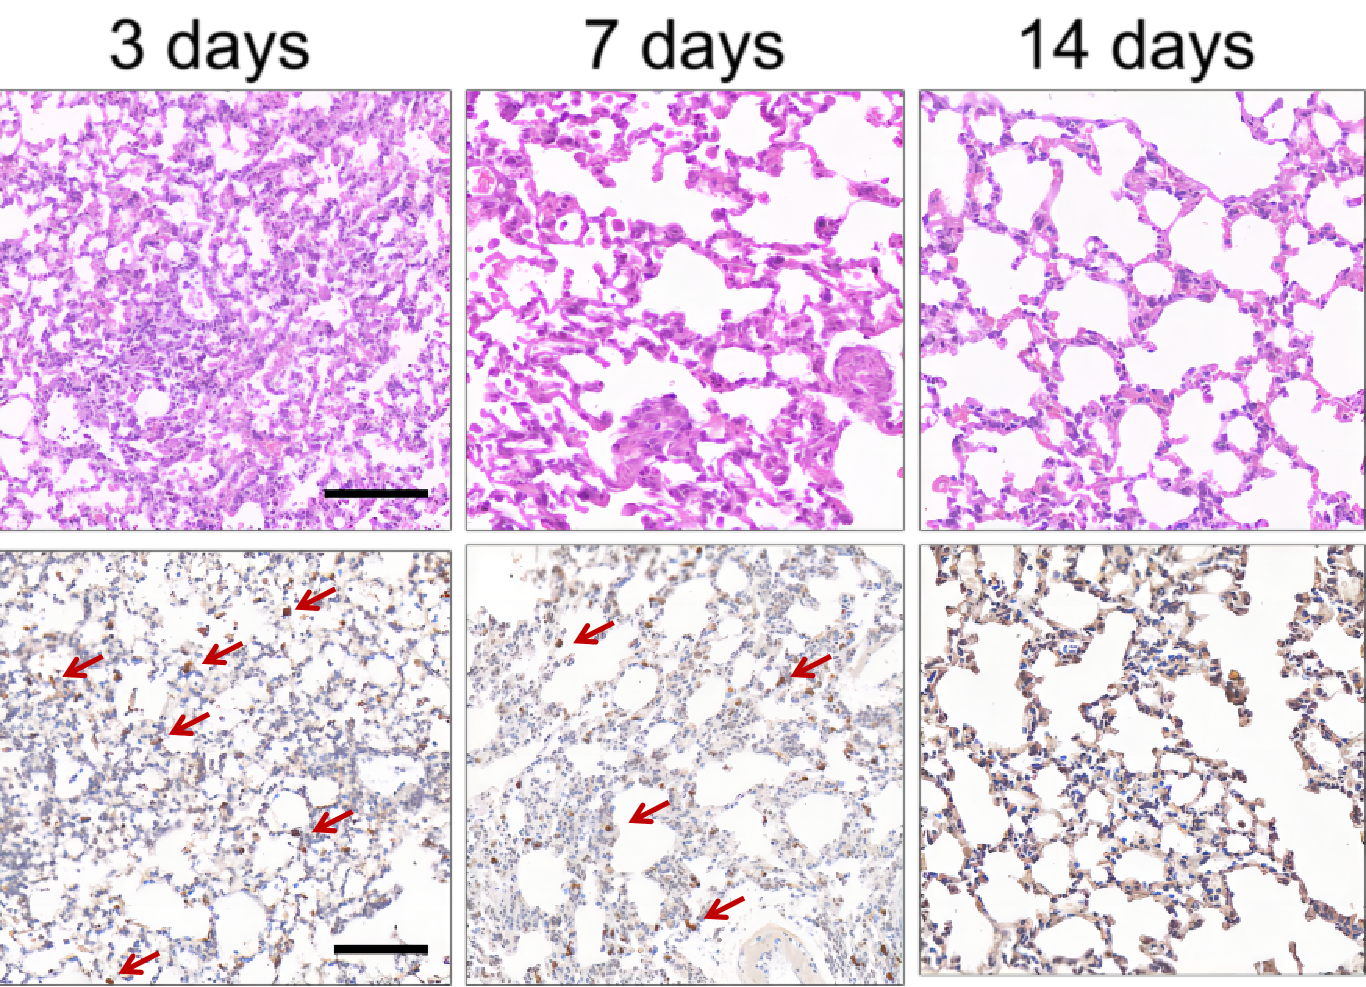


**Figure S19** The lung organs of T705@DATA-COF-Pro group stained with H&E and immunohistochemistry for H1N1 infected BALB/c nude mice (The red arrow refers to H1N1 NP protein, bar: 100 μm).


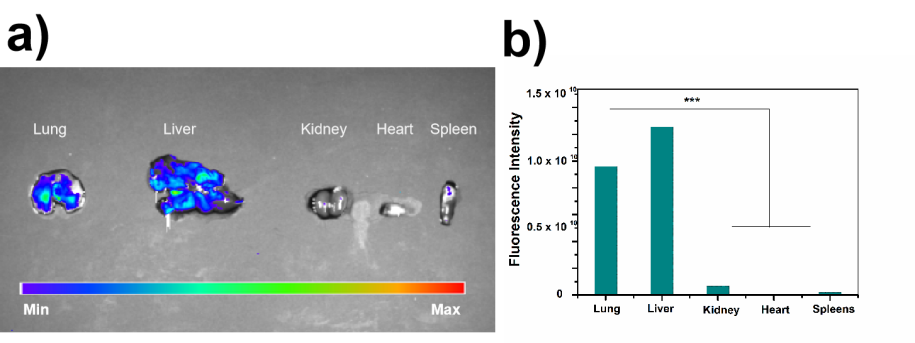


**Figure S20** a, b) Fluorescence images of main organs of the T705@DATA-COF-Pro group was performed after 70 min post-injection.


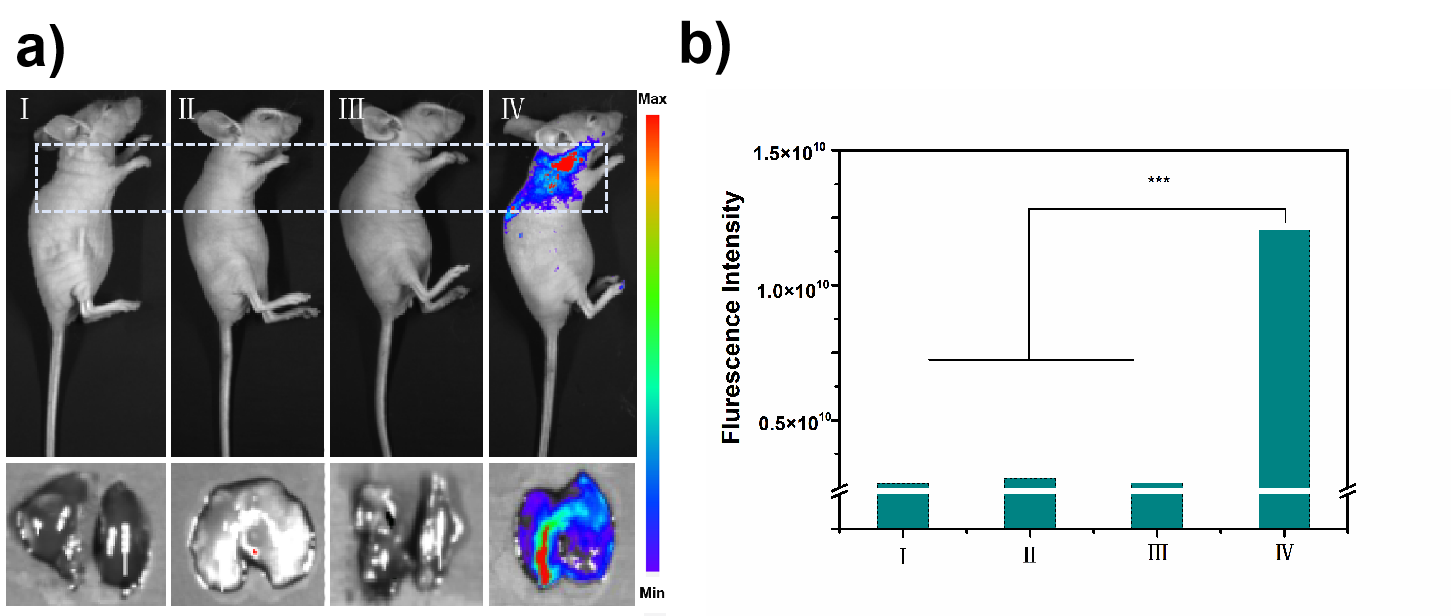


**Figure S21** a, b) The representative image and fluorescence intensity analysis at 70 min of the H1N1 infected BALB/c nude mouse after the different administration (Ⅰ, Normal saline (100 µL); Ⅱ, DATA-COF(100 µL, 2.0 mg/mL); Ⅲ, T705@DATA-COF(100 µL, 2.0 mg/mL); Ⅳ, T705@DATA-COF-Pro(100 µL, 2.0 mg/mL)).

1. **The working mechanism**


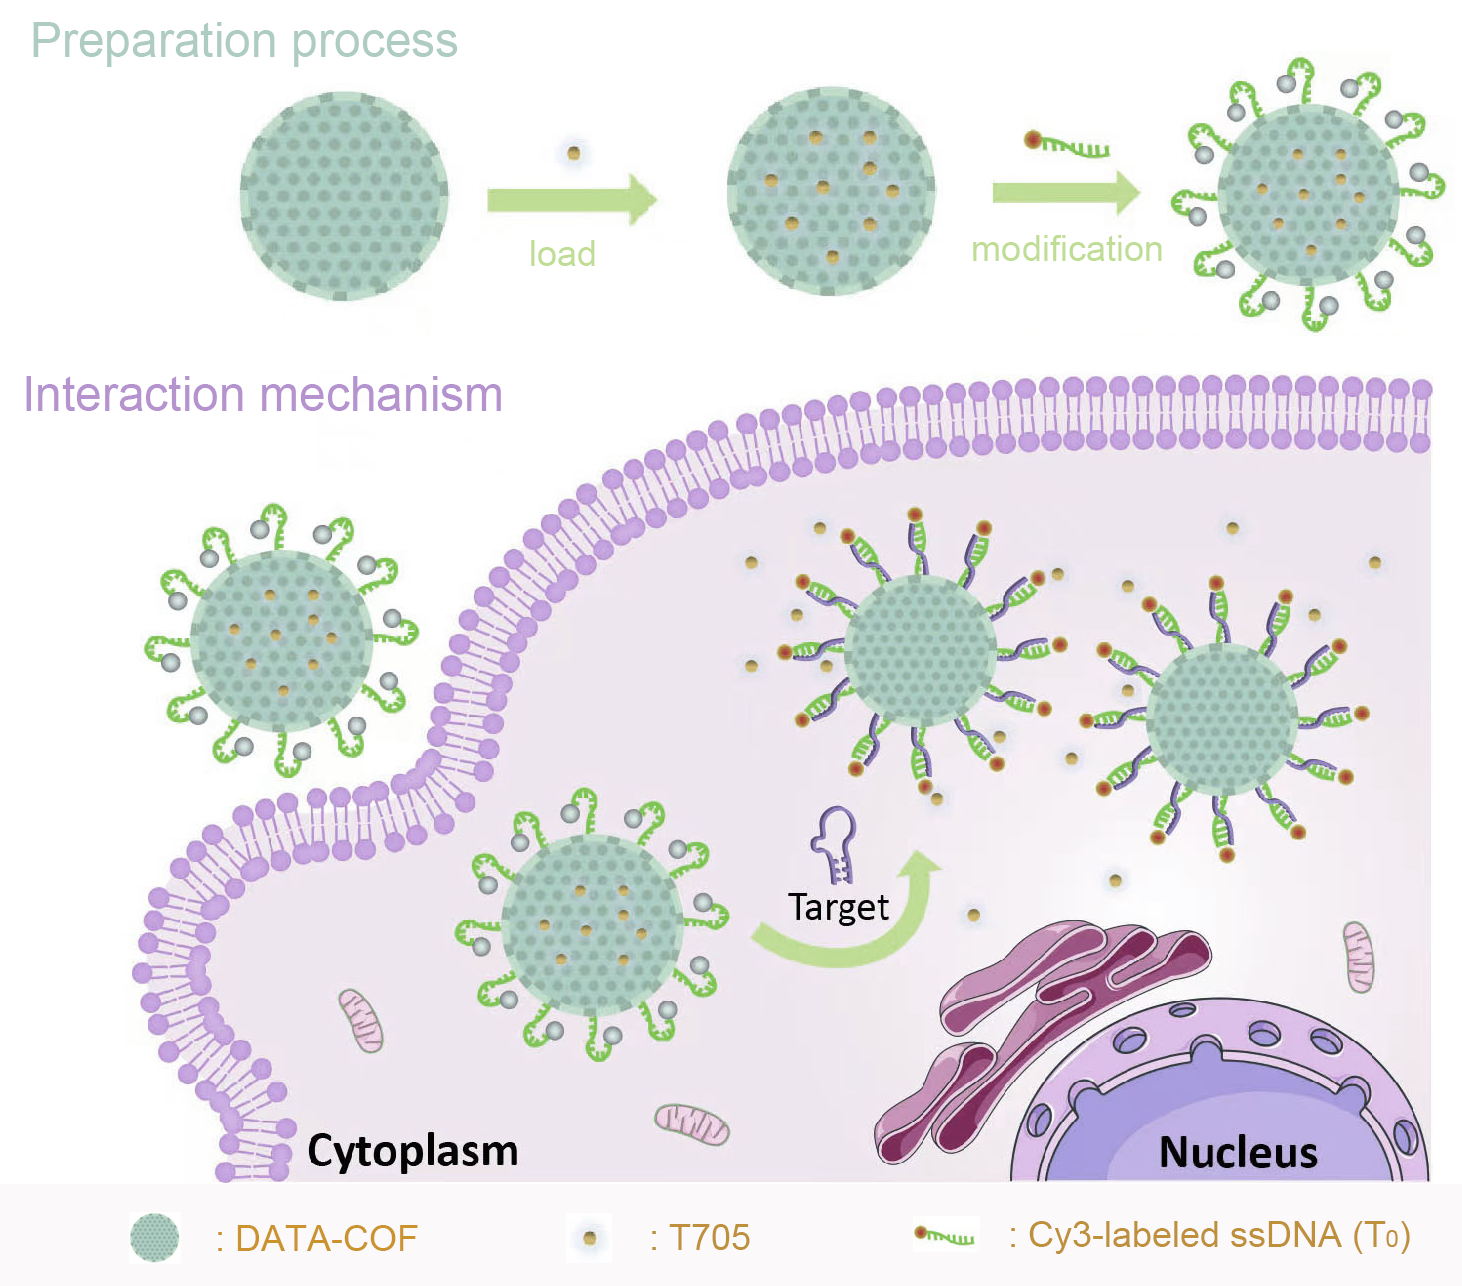


**Figure S22** The preparation procedures and the working mechanism of T705@DATA-COF-Pro.

**7. References**

1, Li F, Ding LG, Yao BJ, et al. Pd loaded and covalent-organic framework involved chitosan aerogels and their application for continuous flow-through aqueous CB decontamination. *J. Mater. Chem. A,* 2018;6:11140-11146. doi: 10.1039/C8TA03275K
